# Supplementary material for: Tannic acid-reinforced zwitterionic hydrogels with multi-functionalities for diabetic wound treatment
Source: Royal Society of Chemistry journal article supplement (doi:10.1039/d1tb02413b), 2022-01-01
Supplement: d1tb02413b1.pdf [file d1tb02413b1.pdf]

## Supporting Information

### **Tannic acid-reinforced zwitterionic hydrogels with multi-functionalities for diabetic wound treatment**

Kun Fang,<sup>‡,a,b</sup> Qinwei Gu,<sup>‡,a,b</sup> Mingzhu Zeng,<sup>a</sup> Zhimao Huang,<sup>a</sup> Haofeng Qiu,<sup>c</sup> Jiru Miao,<sup>a</sup> Yue Fang,<sup>a</sup> Yinyu Zhao,<sup>a</sup> Ying Xiao,<sup>a</sup> Ting Xu,<sup>a</sup> Robert Petrovich Golodok,<sup>d</sup> Vadim Victorovich Savich,<sup>d</sup> Alexander Phydorovich Ilyushchenko,<sup>d</sup> Fanrong Ai,<sup>b</sup> Donglei Liu,<sup>\*,b</sup> and Rong Wang<sup>\*,a</sup>

a. Zhejiang International Scientific and Technological Cooperative Base of Biomedical Materials and Technology, Zhejiang Engineering Research Center for Biomedical Materials, Cixi Institute of Biomedical Engineering, Ningbo Institute of Materials Technology and Engineering, Chinese Academy of Sciences, Ningbo 315300, China. Email: rong.wang@nimte.ac.cn

b. School of Mechatronics Engineering, Nanchang University, Nanchang 330031, China. Email: dlliu@ncu.edu.cn

c. School of Materials Science and Engineering, Nanjing University of Science and Technology, Nanjing 210094, China

d. SSI O V Roman Powder Metallurgy Institute, National Academy of Sciences of Belarus, Minsk, 220005, Belarus

<sup>‡</sup> These authors made equal contributions to this work.

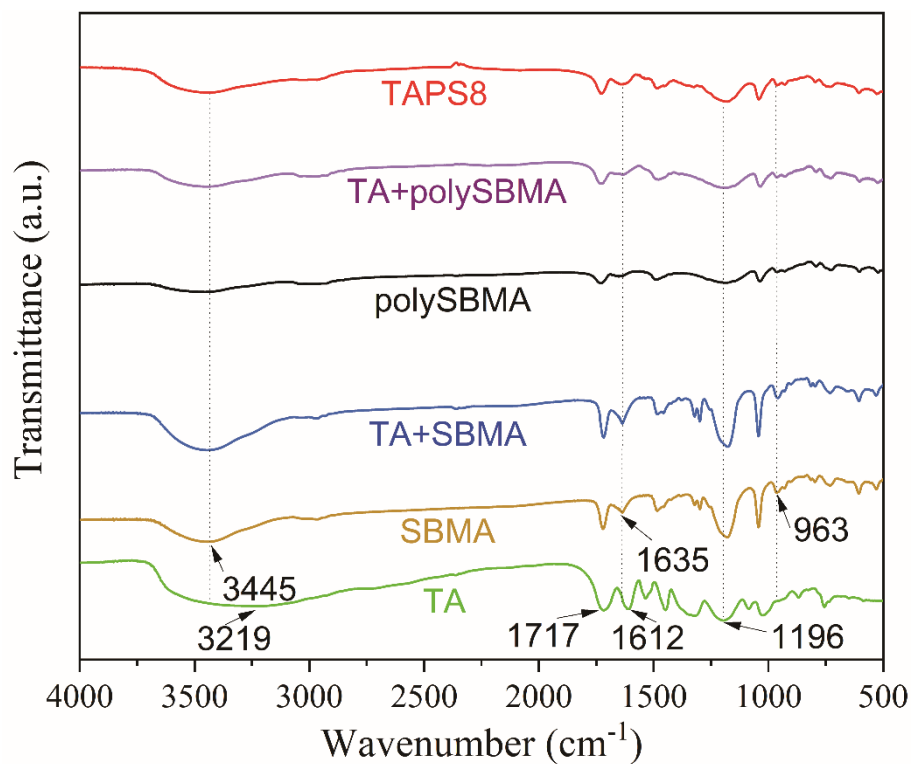

**Figure S1.** FTIR spectra of TA, SBMA monomer, mixture of TA and SBMA monomer (TA+SBMA), polySBMA, mixture of TA and polySBMA (TA+polySBMA), and TAPS8.

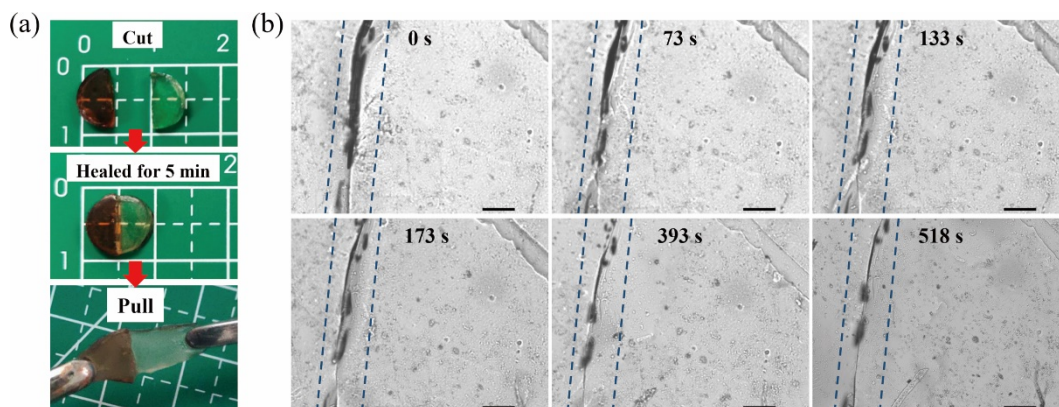

**Figure S2.** (a) Photos show two pieces of TAPS8 hydrogels (one stained by Congo red) healed together over 5 min. (b) Healing progress of a scratch on TAPS8 hydrogel within 9 min. Scale bars represent 50  $\mu\text{m}$ .

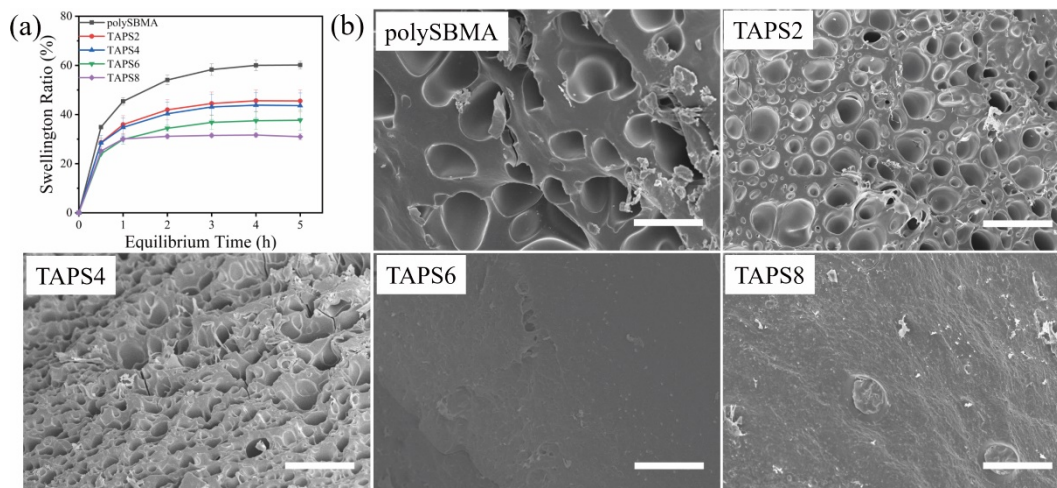

**Figure S3.** (a) Swelling behavior of polySBMA and TAPS hydrogels in deionized water over 5 h. (b) SEM images of the cross-section of polySBMA and TAPS hydrogels after swelling. Scale bars represent 50  $\mu\text{m}$ .

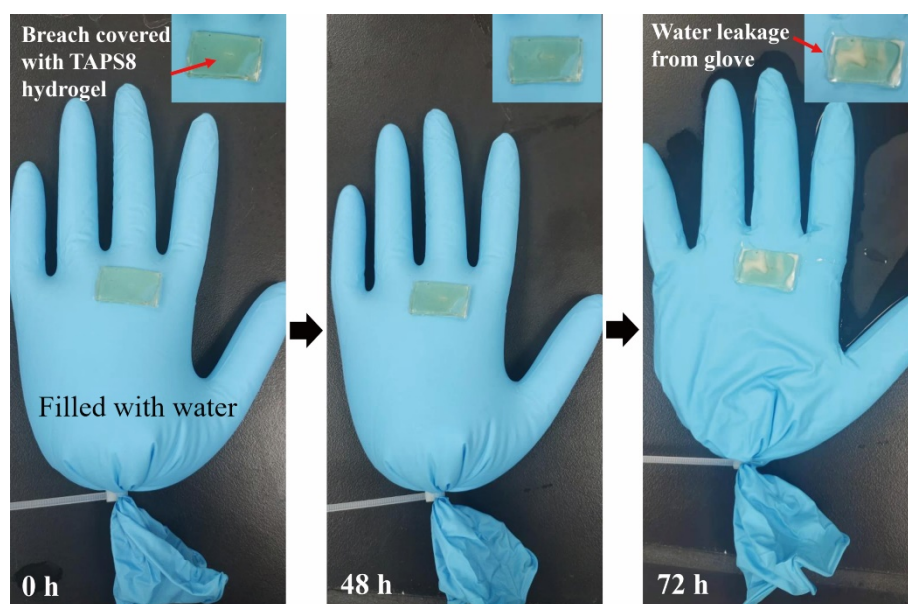

**Figure S4.** Photos of a TAPS8 hydrogel adhering over the breach of a nitrile glove prevented leakage of water for up to 48 h. Water leakage was observed at 72 h.

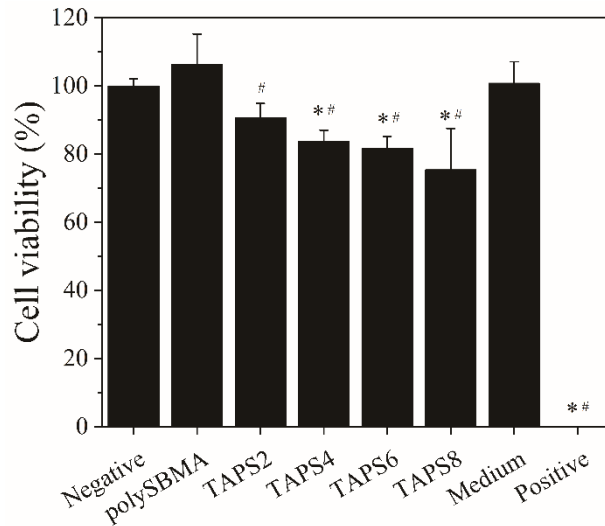

**Figure S5.** Viability of NIH/3T3 fibroblast after incubating in extracts of polySBMA and TAPS hydrogels for 24 h. \* and # denote statistically significant difference with  $p < 0.05$  compared to the negative control, and polySBMA group, respectively.

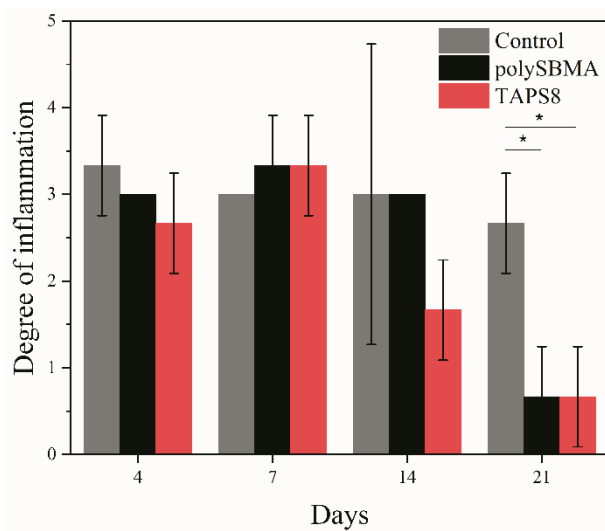

**Figure S6.** Degree of inflammation of wound beds evaluated by a blinded pathologist following the criteria: 0, normal; 1, very mild; 2, mild; 3, severe; 4, very severe. \* denotes statistically significant difference with  $p < 0.05$  compared to the control group.

**Table S1.** Irritation score of skin after treated with gauze (with PBS), polySBMA hydrogel and TAPS8 hydrogel over different time.

|          | <b>Average irritation score</b> |            |            |            | <b>Response category</b> |
|----------|---------------------------------|------------|------------|------------|--------------------------|
|          | <b>1h</b>                       | <b>24h</b> | <b>48h</b> | <b>72h</b> |                          |
| Gauze    | 0                               | 0          | 0          | 0          | Negligible               |
| polySBMA | 0                               | 0          | 0          | 0          | Negligible               |
| TAPS8    | 0                               | 0          | 0          | 0          | Negligible               |
